# Supplementary material for: Plasmid DNA-coding p62 as a bone effective anti-inflammatory/anabolic agent
Source: PubMed Central journal article supplement (PMC4414139; doi:10.18632/oncotarget.2884), 2015-02-12
Supplement: oncotarget-06-3590-s001.pdf [file oncotarget-06-3590-s001.pdf]

## SUPPLEMENTARY FIGURE

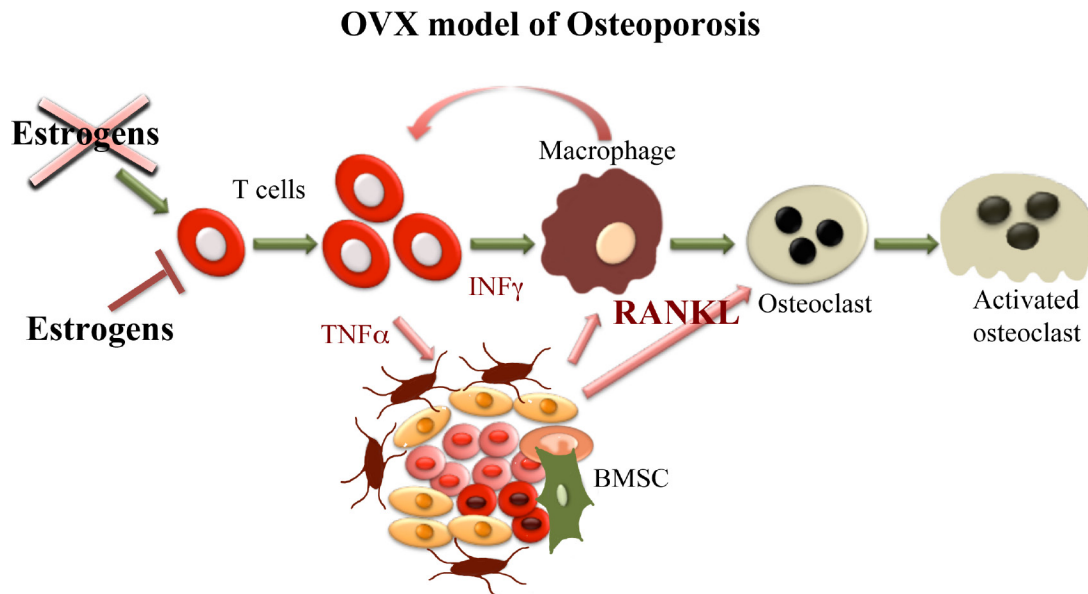

**Supplementary Figure 1: Graphic illustration of the role of T cells in the mechanism by which ovx supports osteoclastogenesis.** After ovariectomy estrogen deficiency promotes T cell activation within the bone marrow. Activated T cells secrete TNF $\alpha$ , which coupled with RANKL secretion stimulates osteoclast formation and concurrently increase M-CSF, and other pro-inflammatory factors [16].
